# Supplementary material for: Riding the Pandemic Waves—Lessons to Be Learned from the COVID-19 Crisis Management in Romania
Source: MDPI journal article supplement (doi:10.3390/tropicalmed7070122), 2022-06-29
Supplement: s1 [file s1]

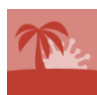

# Supplementary Materials: Riding the Pandemic Waves—Lessons to Be Learned from the COVID-19 Crisis Management in Romania

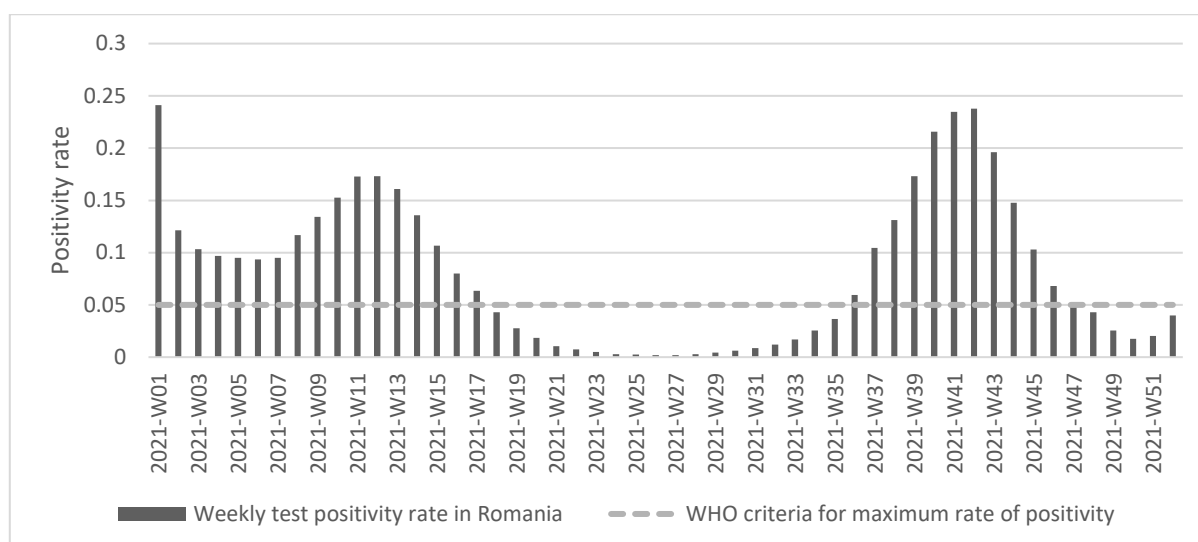

**Figure S1.** Weekly test positivity rate in Romania between 1 January and 31 December 2021. Source: ECDC (2022).

**Table S1.** Sequencing volume sufficient to estimate variant proportions at 5% prevalence in Romania in 2021 between Week 1 and Week 52.

| Year Week | Weekly New cases | Number Se-<br>quenced Re-<br>ported to<br>GISAID | Percent Cases Se-<br>quenced Reported<br>to GISAID | Number Se-<br>quenced Re-<br>ported to TESSY | Percent Cases Se-<br>quenced Re-<br>ported to TESSY | Sequencing Volume Suf-<br>ficient to Estimate Vari-<br>ant Proportions at 5%<br>Prevalence |
|-----------|------------------|--------------------------------------------------|----------------------------------------------------|----------------------------------------------|-----------------------------------------------------|--------------------------------------------------------------------------------------------|
| 2021-01   | 29,409           | 69                                               | 0.2                                                | 68                                           | 0.2                                                 | Insufficient                                                                               |
| 2021-02   | 20,757           | 47                                               | 0.2                                                | 0                                            | 0                                                   | Insufficient                                                                               |
| 2021-03   | 17,383           | 53                                               | 0.3                                                | 14                                           | 0.1                                                 | Insufficient                                                                               |
| 2021-04   | 17,240           | 71                                               | 0.4                                                | 132                                          | 0.8                                                 | Insufficient                                                                               |
| 2021-05   | 16,659           | 100                                              | 0.6                                                | 105                                          | 0.6                                                 | Insufficient                                                                               |
| 2021-06   | 16,498           | 67                                               | 0.4                                                | 82                                           | 0.5                                                 | Insufficient                                                                               |
| 2021-07   | 18,404           | 101                                              | 0.5                                                | 90                                           | 0.5                                                 | Insufficient                                                                               |
| 2021-08   | 23,068           | 142                                              | 0.6                                                | 45                                           | 0.2                                                 | Insufficient                                                                               |
| 2021-09   | 27,212           | 128                                              | 0.5                                                | 228                                          | 0.8                                                 | Insufficient                                                                               |
| 2021-10   | 32,564           | 180                                              | 0.6                                                | 77                                           | 0.2                                                 | Insufficient                                                                               |
| 2021-11   | 38,123           | 88                                               | 0.2                                                | 185                                          | 0.5                                                 | Insufficient                                                                               |
| 2021-12   | 39,497           | 121                                              | 0.3                                                | 16                                           | 0                                                   | Insufficient                                                                               |
| 2021-13   | 37,268           | 183                                              | 0.5                                                | 128                                          | 0.3                                                 | Insufficient                                                                               |
| 2021-14   | 30,084           | 119                                              | 0.4                                                | 195                                          | 0.6                                                 | Insufficient                                                                               |
| 2021-15   | 22,125           | 74                                               | 0.3                                                | 94                                           | 0.4                                                 | Insufficient                                                                               |
| 2021-16   | 16,108           | 94                                               | 0.6                                                | 34                                           | 0.2                                                 | Insufficient                                                                               |
| 2021-17   | 10,403           | 39                                               | 0.4                                                | 154                                          | 1.5                                                 | Insufficient                                                                               |
| 2021-18   | 8313             | 117                                              | 1.4                                                | 101                                          | 1.2                                                 | Insufficient                                                                               |
| 2021-19   | 5399             | 50                                               | 0.9                                                | 63                                           | 1.2                                                 | Insufficient                                                                               |
| 2021-20   | 3389             | 70                                               | 2.1                                                | 141                                          | 4.2                                                 | Insufficient                                                                               |
| 2021-21   | 1922             | 82                                               | 4.3                                                | 25                                           | 1.3                                                 | Insufficient                                                                               |
| 2021-22   | 1224             | 61                                               | 5                                                  | 528                                          | 43.1                                                | Sufficient                                                                                 |
| 2021-23   | 841              | 58                                               | 6.9                                                | 390                                          | 46.4                                                | Sufficient                                                                                 |
| 2021-24   | 476              | 49                                               | 10.3                                               | 208                                          | 43.7                                                | Sufficient                                                                                 |

|         |         |     |      |      |      |              |
|---------|---------|-----|------|------|------|--------------|
| 2021-25 | 393     | 23  | 5.9  | 386  | 98.2 | Sufficient   |
| 2021-26 | 298     | 32  | 10.7 | 100  | 33.6 | Insufficient |
| 2021-27 | 305     | 26  | 8.5  | 190  | 62.3 | Sufficient   |
| 2021-28 | 431     | 29  | 6.7  | 110  | 25.5 | Insufficient |
| 2021-29 | 703     | 68  | 9.7  | 148  | 21.1 | Insufficient |
| 2021-30 | 1138    | 110 | 9.7  | 330  | 29   | Sufficient   |
| 2021-31 | 1645    | 152 | 9.2  | 170  | 10.3 | Insufficient |
| 2021-32 | 2536    | 148 | 5.8  | 98   | 3.9  | Insufficient |
| 2021-33 | 3891    | 133 | 3.4  | 192  | 4.9  | Insufficient |
| 2021-34 | 6315    | 234 | 3.7  | 350  | 5.5  | Sufficient   |
| 2021-35 | 9866    | 355 | 3.6  | 386  | 3.9  | Sufficient   |
| 2021-36 | 16,541  | 506 | 3.1  | 700  | 4.2  | Sufficient   |
| 2021-37 | 30,867  | 553 | 1.8  | 758  | 2.5  | Sufficient   |
| 2021-38 | 48,182  | 501 | 1    | 954  | 2    | Sufficient   |
| 2021-39 | 76,707  | 488 | 0.6  | 1038 | 1.4  | Sufficient   |
| 2021-40 | 91,906  | 589 | 0.6  | 702  | 0.8  | Sufficient   |
| 2021-41 | 101,812 | 304 | 0.3  | 702  | 0.7  | Sufficient   |
| 2021-42 | 103,649 | 372 | 0.4  | 940  | 0.9  | Sufficient   |
| 2021-43 | 81,597  | 264 | 0.3  | 572  | 0.7  | Sufficient   |
| 2021-44 | 54,463  | 158 | 0.3  | 510  | 0.9  | Sufficient   |
| 2021-45 | 31,806  | 111 | 0.3  | 666  | 2.1  | Sufficient   |
| 2021-46 | 18,951  | 155 | 0.8  | 384  | 2    | Sufficient   |
| 2021-47 | 12,882  | 65  | 0.5  | 546  | 4.2  | Sufficient   |
| 2021-48 | 8201    | 77  | 0.9  | 330  | 4    | Sufficient   |
| 2021-49 | 6335    | 76  | 1.2  | 222  | 3.5  | Insufficient |
| 2021-50 | 4686    | 175 | 3.7  | 374  | 8    | Sufficient   |
| 2021-51 | 4424    | 78  | 1.8  | 334  | 7.5  | Sufficient   |
| 2021-52 | 9351    | 135 | 1.4  | 778  | 8.3  | Sufficient   |

Sources: ECDC (2022).

**Table S2.** Share of fully vaccinated people by age groups in Romania and EU Member States in 2021 Week 35 and Week 52.

| Week      | Age Group   | Romania | EU    |
|-----------|-------------|---------|-------|
| 2021 W 35 | 18-24 years | 25.7%   | 49.2% |
|           | 25-49 years | 30.7%   | 60.1% |
|           | 50-59 years | 37.3%   | 72.5% |
|           | 60 + years  | 34.3%   | 82.9% |
| 2021 W 52 | 18-24 years | 47.2%   | 71.3% |
|           | 25-49 years | 48.2%   | 74.9% |
|           | 50-59 years | 55.2%   | 81.0% |
|           | 60 + years  | 45.5%   | 89.1% |

Sources: ECDC (2022).

**Table S3.** Cumulative excess mortality per million people in the EU Member States as of December 26. 2021.

| Country   | Excess Death per Million |
|-----------|--------------------------|
| Bulgaria  | 8344                     |
| Lithuania | 5917                     |
| Romania   | 5616                     |
| Slovakia  | 4444                     |
| Poland    | 4067                     |
| Croatia   | 4021                     |
| Czechia   | 3838                     |
| Latvia    | 3690                     |
| Hungary   | 3660                     |
| Italy     | 2768                     |
| Slovenia  | 2362                     |
| Estonia   | 2349                     |

|             |      |
|-------------|------|
| Greece      | 2288 |
| Spain       | 2186 |
| Portugal    | 2039 |
| Belgium     | 1755 |
| Austria     | 1679 |
| Netherlands | 1637 |
| France      | 1153 |
| Germany     | 1025 |
| Sweden      | 964  |
| Cyprus      | 843  |
| Malta       | 789  |
| Ireland     | 593  |
| Finland     | 480  |
| Denmark     | 136  |
| Luxembourg  | 83   |

---

Sources: University of Oxford (2022).
